# Supplementary material
Source: HighWire-hosted journal article supplement (http://d2538ggaoe6cji.cloudfront.net/highwire/filestream/45153/field_highwire_adjunct_files/0/107029-1.pdf)
Supplement: 107029-1.pdf [file 107029-1.pdf]

Supplementary Figure 1

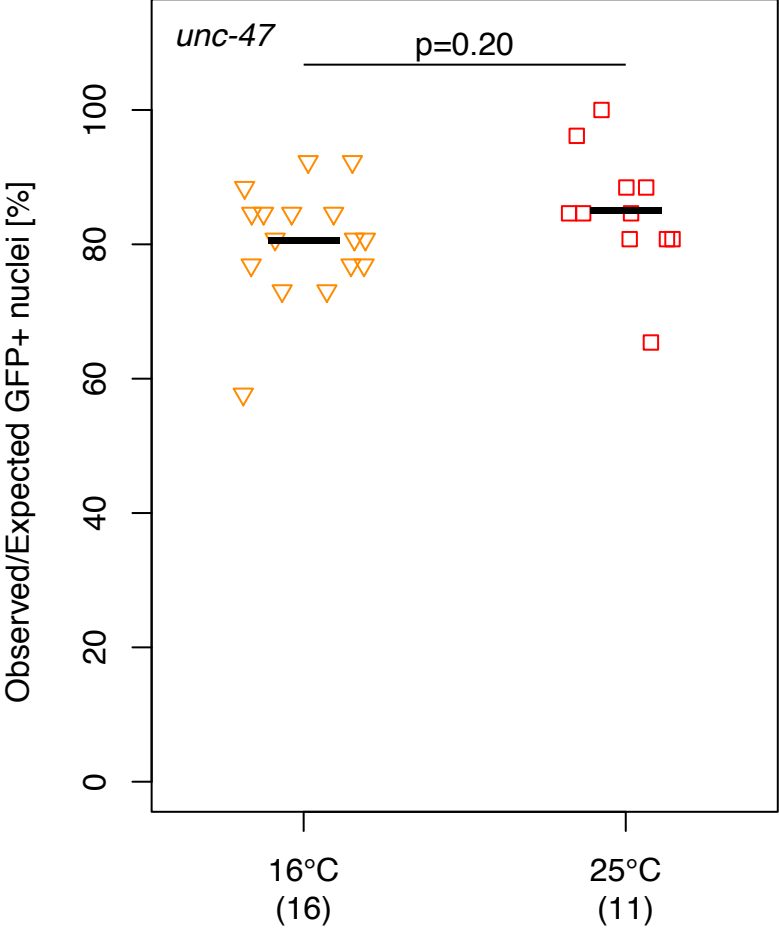

**A**

$P_{hsp-16.41} > mCh::his-58 > gfp::his-58$ ;  $P_{unc-119}::FLP D5$   
 Extrachr array                      MosSCI

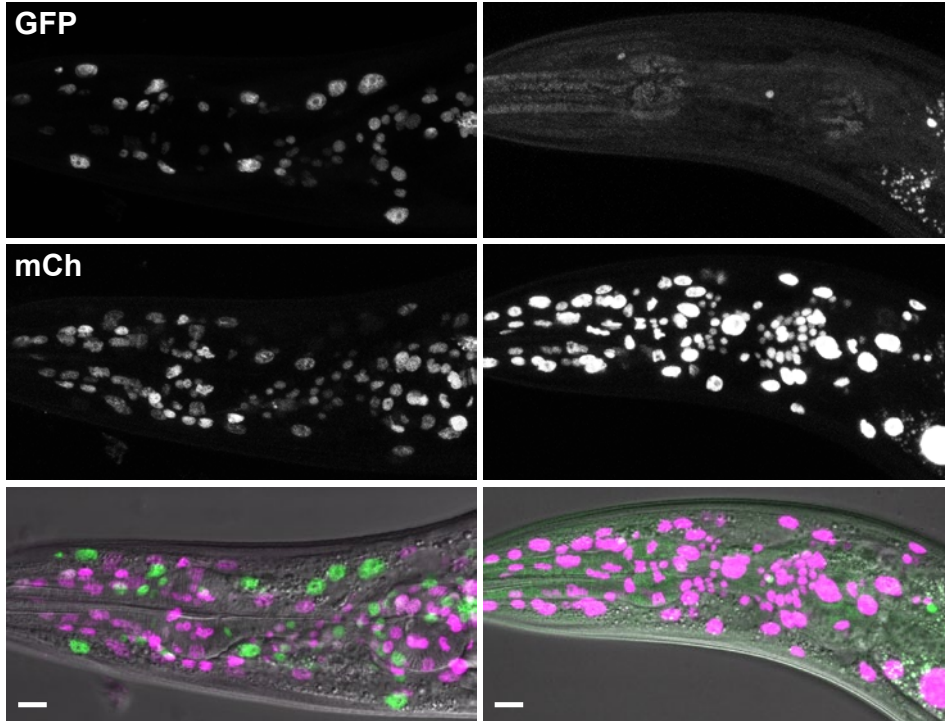

**C**

$P_{hsp-16.41} > mCh::his-58 > gfp::his-58$ ;  $P_{rgef-1}::FLP D5$ ;  $P_{unc-47}::mCh$

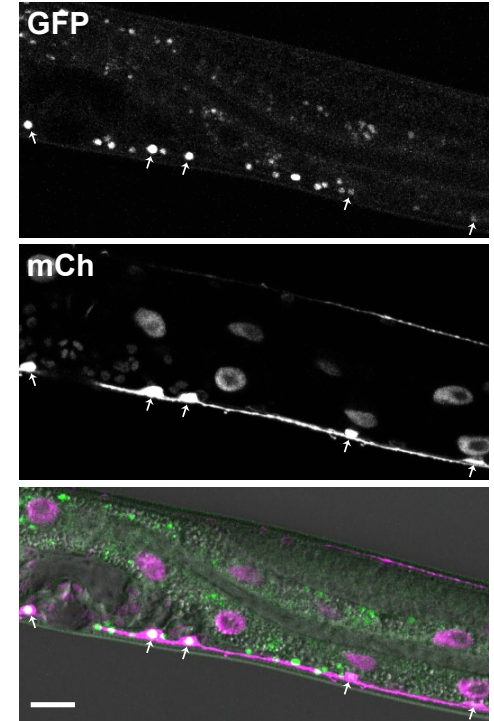

**B**

$P_{hsp-16.41} > mCh::his-58 > gfp::his-58$ ;  $P_{elt-2}::FLP D5$

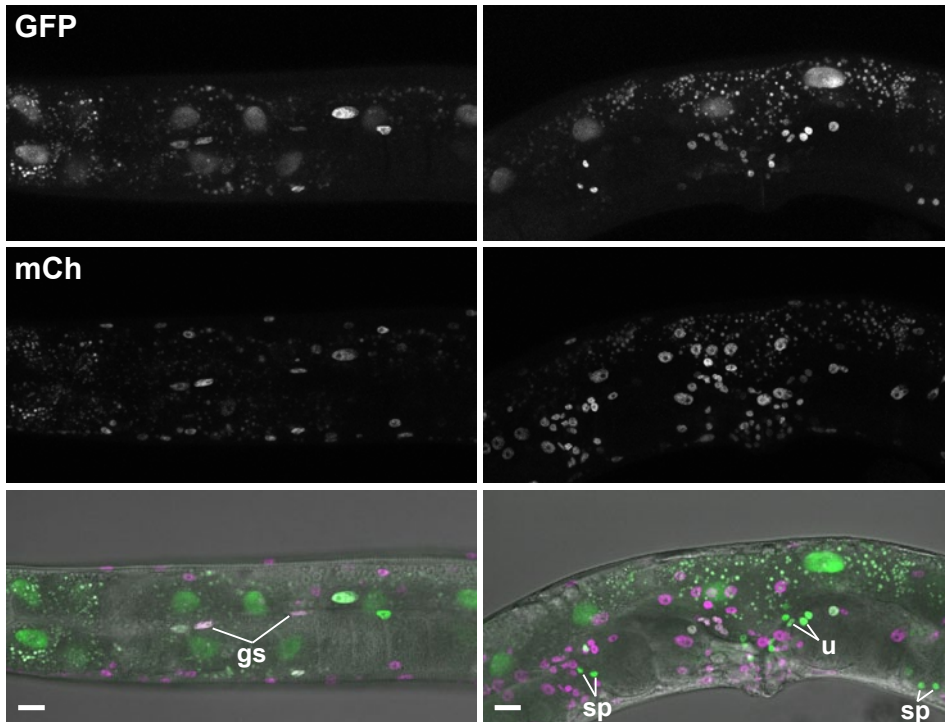

**D**

$P_{hsp-16.41} > mCh::his-58 > gfp::his-58$ ;  $P_{rgef-1}::FLP D5$ ;  $P_{dat-1}::mCh$

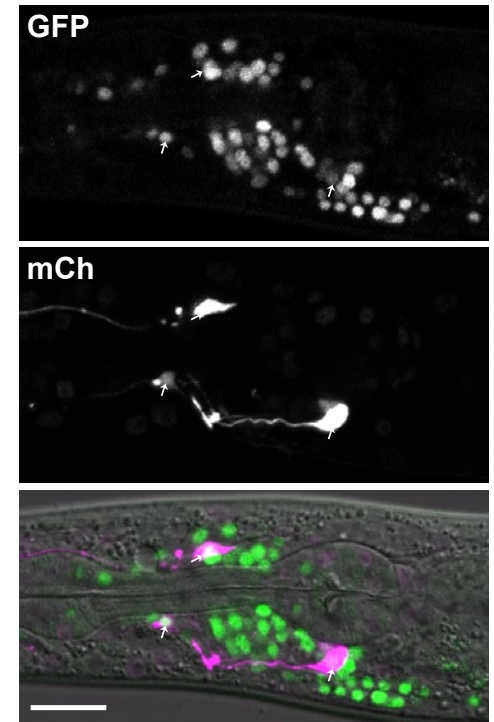

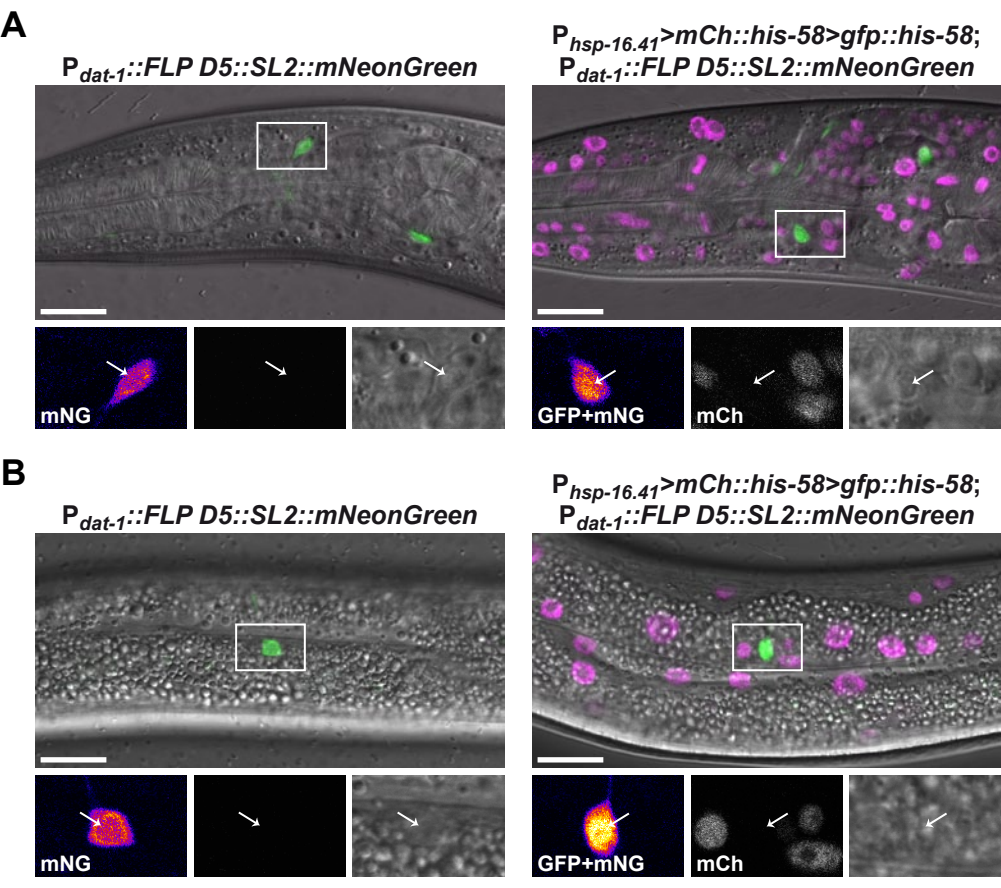

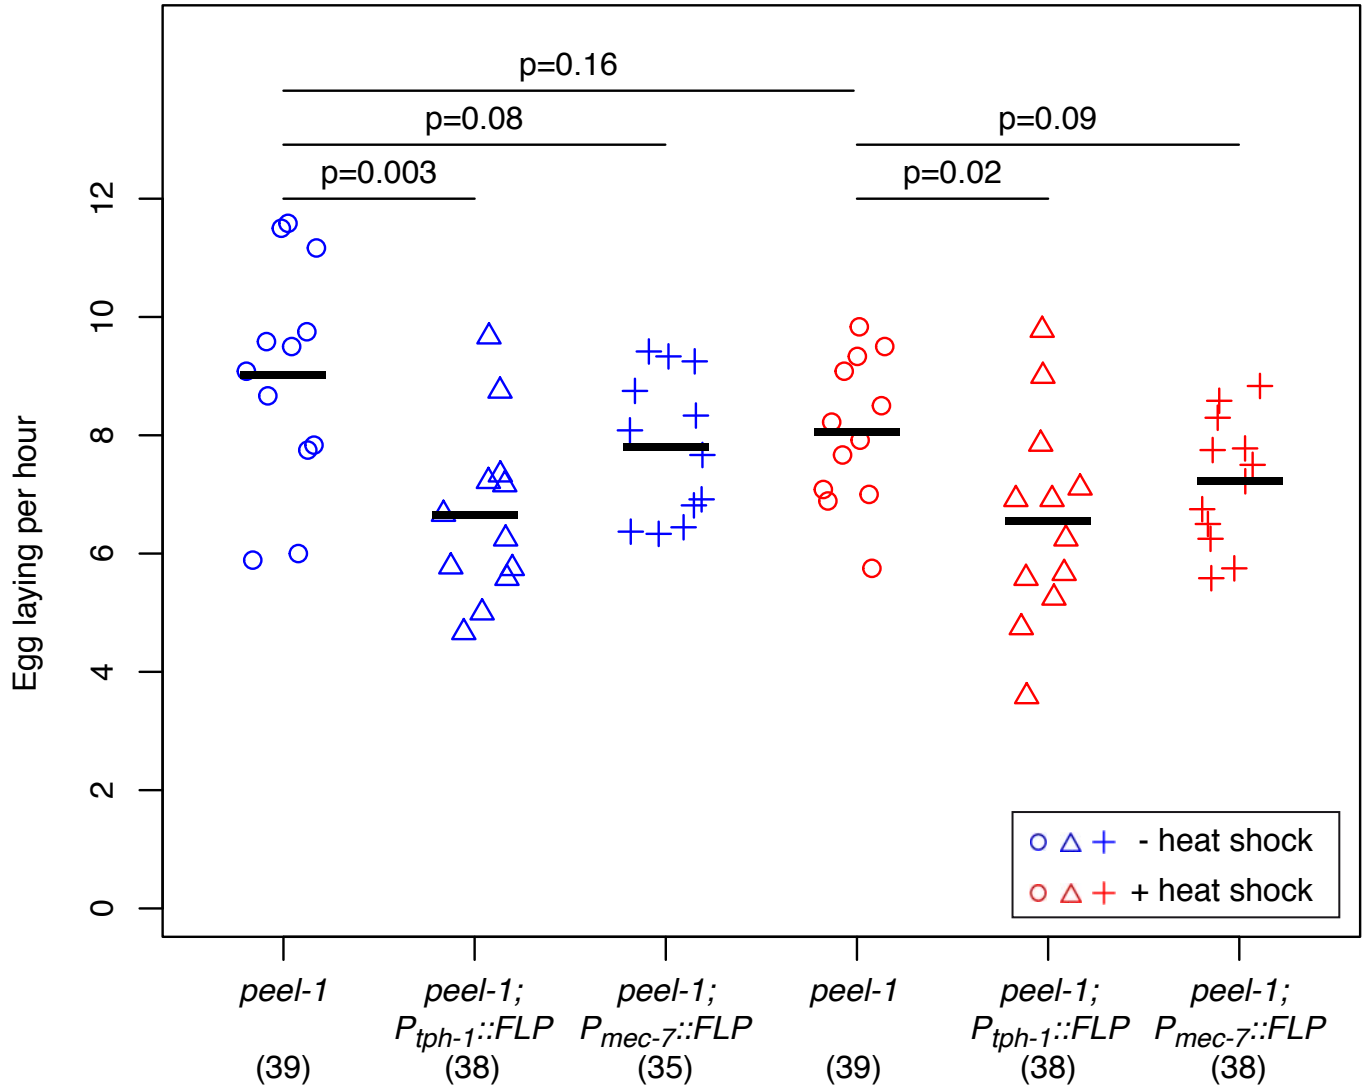

Supplementary Table S1

| Primer # | Primer sequence                                     | Primer description                                                           |
|----------|-----------------------------------------------------|------------------------------------------------------------------------------|
| B211     | gtcctgtcacactcgtaaaaaac                             | Forward primer for Phsp-16.41>mCherry 5'half                                 |
| B220     | agtgtagaGTCTCAAAGGGTGAAGAAGAT                       | Forward primer for mCherry 3'half::his-58                                    |
| B355     | ctctgcaggTACTTGCTGgAAGTGTACTTG                      | Reverse primer for mCherry 3'half::his-58                                    |
| B440     | gagtctgtcgtcactgtaaca                               | Reverse primer for Phsp-16.41>mCherry 5'half                                 |
| B441     | cgcgcggtaccAAAAATGCCACAATTTGGTATA                   | Forward primer for FLP pWD79                                                 |
| B445     | GCGCGCGGCCGCGTACAAAAAGCAGGCTT                       | Forward primer for >mCherry::3'UTRlet-858>gfp cassette                       |
| B446     | GCGCGCCCGGTTTGTATAGTTCGTCCAT                        | Reverse primer for >mCherry::3'UTRlet-858>gfp cassette                       |
| B551     | taccgggGAAAGCCGGTTACCAT                             | Reverse primer for FLP pWD79                                                 |
| B570     | ggtacaaaaATGCCACAATTCGGA                            | Forward primer for FLP G5                                                    |
| B571     | cccgggagacgctTAGATACGA                              | Reverse primer for FLP G5                                                    |
| B572     | CTTGGTCTCGGTGACGAGGCATTGGATGATGACTCCGA              | Reverse primer to stitch FLP G5 fragments                                    |
| B573     | TGCCTCGTACCCGAGACCAAGACCTCCGTCTCCCGTAC              | Forward primer to stitch FLP G5 fragments                                    |
| B662     | CCAGATATCCTGCAGGTAGC                                | Forward primer between unc-119 and Phsp16.41; designed for Gibson assembly   |
| B674     | ACGCGTgcAGATCTgaGCC                                 | Reverse primer Dam for Gibson assembly                                       |
| B675     | ggtaccgtagaCCGTCGACCTCGAGATGaag                     | Forward primer Dam for Gibson assembly                                       |
| B676     | GTCGACGGtctaccggtaccGAAGTCC                         | Reverse primer FRT for Gibson assembly                                       |
| B826     | aggtacaaaaATGCCACAATTCGacATTCTCTGTAAG               | Forward primer for FLP D5                                                    |
| B827     | ATTCTCTGTAAGACACCACC                                | Forward primer for Gibson assembly with gBlock                               |
| B828     | ggatctgcatTTAGATACGACGGTTGATGT                      | Reverse primer for Gibson assembly with tbb-2 3'UTR                          |
| B829     | CGTCGTATCTAAatgcaagatcctttcaagca                    | Forward primer for tbb-2 3' UTR                                              |
| B830     | gagaatgtctagaactaGccccgggtgatccacgatctggaagat       | Reverse primer for tbb-2 3' UTR                                              |
| B871     | ACCTCGAGaaaaATGCGCTTTGATTTCCAAAAC                   | Forward primer for peel-1                                                    |
| B872     | gcGCTAGCTCATGGATTTTCAACACTTGG                       | Reverse primer for peel-1                                                    |
| B961     | ttgATGCTTAACAGAAGTCGACA                             | baf-1 sgRNA; top oligo; for SapTrap vector; cuts at ATG                      |
| B962     | aacTGTCGACTTCTGTTAAGCAT                             | baf-1 sgRNA; bottom oligo; for SapTrap vector; cuts at ATG                   |
| B963     | TGGcgattttcgaataattttcaaatcaagaatgtaattttttgtttt    | baf-1 5'HA for SapTrap vector; top oligo; baf-1 promoter                     |
| B964     | CATggtttctgaaacacaaaataattacattctgaaatttgaataattttc | baf-1 5'HA for SapTrap vector; bottom oligo; baf-1 promoter                  |
| B965     | acgTCGACTTCTGTTAAGCATCGTGAGTTCGTCGGAGAGC            | baf-1 3'HA for SapTrap vector; top oligo; baf-1 ORF                          |
| B966     | tacGACTTCTTTGTCGCCATTGGCTCCGACGAACTCAC              | baf-1 3'HA for SapTrap vector; bottom oligo; baf-1 ORF                       |
| B1012    | ACATCAACCGTCGTATCTAAcgcgtgctgctcatcctactttca        | Forward primer to amplify gpd-2/-3 transsplicing sequence                    |
| B1013    | TCTTCTCCCTTCGACACCATgatgctggaagcagtttcc             | Reverse primer to amplify gpd-2/-3 transsplicing sequence                    |
| B1014    | ggaaactgctcaacgcatcATGGTGTGGAAGGGAGAAGA             | Forward primer to amplify mNeonGreen                                         |
| B1015    | TGAAGGATATGCAGATACATacgcTTACTTGTAGAGTTC             | Reverse primer to amplify mNeonGreen                                         |
| B1064    | CATTTTGTCCAGATAAggtaccgGTACAAAAAGCAGGC              | Forward primer for >mCherry::his-58...; designed for Gibson assembly         |
| B1065    | gagaatgtctagaactaGccccGGAAACAGTTATGTTGGTA           | Reverse primer for ...gfp::his-58::3'UTRunc-54; designed for Gibson assembly |

Supplementary Table S2

| Promoter         | Primers (F=forward; R=reverse)                                                                              | Length [bp Sequence verified]   |
|------------------|-------------------------------------------------------------------------------------------------------------|---------------------------------|
| <i>dat-1</i>     | F atgcgggccgcGCTCTATTGAGCAACTTTGGG<br>R ctggtaccGGCTAAAAATTGTTGAGATTC                                       | 561 full length                 |
| <i>dpy-7</i>     | F GAGCCGGCTGTAGCATgcgccgcATCTCATTCCACGATTTCTCGC<br>R gtCGAATTGTGGCATttttgtaccTTATCTGGAACAAAATGTAAG          | 346 full length                 |
| <i>elt-2</i>     | F GAGCCGGCTGTAGCATgcgccgcCCTGAGACGGATATACATCGGT<br>R gtCGAATTGTGGCATttttgtaccTCTATAATCTATTTTCTAGTTTCTATTTTA | 4344 full length; 3 A nt indels |
| <i>hlh-8</i>     | F GAGCCGGCTGTAGCATgcgccgcCATGATGGTATAGAATGGGAC<br>R gtCGAATTGTGGCATttttgtaccCTGTGAAAATCATATTTGAAATCG        | 556 full length                 |
| <i>hsp-16.41</i> | F atgcgccCGCCAAGCTTGCATGCCTGC<br>R gtcgaattgtggcatttttGGTACCGCCCCCTCGAGGTC                                  | 400 full length                 |
| <i>lag-2</i>     | F atgcgggccgGGCAAAGATTGTGAAGTCCCCT<br>R ttggtaccCTGAAAAAAGGCAAATTTGAAAAG                                    | 616 full length                 |
| <i>mec-7</i>     | F gagccggctgtagcatgcgccgcGTAGTAATCTAGAAATGTAAACCTG<br>R gtcgaattgtggcattttgtaccGTTGCTTGAAATTTGGACCCGA       | 852 full length                 |
| <i>myo-2</i>     | F acctgcaggCATTTTATATCTGAGTAGTATCC<br>R tgggtaccTTCTGTGTCTGACGATCGAG                                        | 976 full length (T785C)         |
| <i>myo-3</i>     | F acctgcaggAGTGATTATAGTCTCTGTTTTT<br>R tgggtaccTTCTAGATGGATCTAGTGGTC                                        | 2500 ~1kb from both ends        |
| <i>nhr-82</i>    | F gagcggccGCGCTACGGCTCTTTTGAGA<br>R ctggtaccCGTGTAAGATCAGAGGTAGAC                                           | 3500 full length                |
| <i>rgef-1</i>    | F gagccggctgtagcatGCGGCCGCACACATCGCTGCCGGAATA<br>R gtcgaattgtggcatTTTTGGTACCGTCGTCGTCGATGC                  | 3499 full length; 1 T insertion |
| <i>tph-1</i>     | F gagccggctgtagcatgcgccgcGTAGTAAGCTCCGATGCGTTC<br>R gtcgaattgtggcattttgtaccATGATTGAAGAGCAATGCTAC            | 377 full length                 |
| <i>unc-119</i>   | F gactgcaggacggtatcgatAAGCTTCAGT<br>R caggtaccATATGCTGTTGTAGCTTTTAAC                                        | 1304 full length                |
| <i>unc-47</i>    | F atgcgggccgcCTGCCAATTTGTCCTGTGAA<br>R ctggtaccCTGTAATGAAATAAATGTGACG                                       | 1300 ~0.5kb from both ends      |

Sequence data are available at Addgene for most constructs; others are available from the authors

**Supplementary Table S3**

| <b>Strain</b> | <b>Promoter</b> | <b>FLP</b> | <b>Genotype</b>                                                                                                                                   | <b>Reference</b> |
|---------------|-----------------|------------|---------------------------------------------------------------------------------------------------------------------------------------------------|------------------|
| BN305         | myo-2           | FLP pWD79  | bqSi305[pBN155(unc-119(+)) Pmyo-2::FLP_pOG44]] IV                                                                                                 | this study       |
| BN307         | myo-2           | FLP pWD79  | bqSi235[pBN103(unc-119(+)) Pemr-1::emr-1::GFP]] II; bqSi305[pBN155(unc-119(+)) Pmyo-2::FLP_pOG44]] IV                                             | this study       |
| BN309         | myo-2           | FLP pWD79  | bqSi294[pBN154(unc-119(+)) Phsp16.41::FRT::mCh::his-58::FRT::gfp::his-58]] II; bqSi305[pBN155(unc-119(+)) Pmyo-2::FLP_pOG44]] IV                  | this study       |
| BN298         | myo-3           | FLP pWD79  | bqSi294[pBN154(unc-119(+)) Phsp16.41::FRT::mCh::his-58::FRT::gfp::his-58]] II; bqEx298[pBN158(unc-119(+)) Pmyo-3::FLP_pOG44]+pRF4(rol-6(su1006))] | this study       |
| BN299         | myo-3           | FLP pWD79  | bqSi294[pBN154(unc-119(+)) Phsp16.41::FRT::mCh::his-58::FRT::gfp::his-58]] II; bqEx299[pBN158(unc-119(+)) Pmyo-3::FLP_pOG44]+pRF4(rol-6(su1006))] | this study       |
| BN301         | myo-3           | FLP pWD79  | bqSi301[pBN158(unc-119(+)) Pmyo-3::FLP_pOG44]] IV                                                                                                 | this study       |
| BN302         | myo-3           | FLP pWD79  | bqSi294[pBN154(unc-119(+)) Phsp16.41::FRT::mCh::his-58::FRT::gfp::his-58]] II; bqSi301[pBN158(unc-119(+)) Pmyo-3::FLP_pOG44]] IV                  | this study       |
| BN306         | myo-3           | FLP pWD79  | bqSi235[pBN103(unc-119(+)) Pemr-1::emr-1::GFP]] II; bqSi301[pBN158(unc-119(+)) Pmyo-3::FLP_pOG44]] IV                                             | this study       |
| BN308         | myo-3           | FLP pWD79  | bqSi294[pBN154(unc-119(+)) Phsp16.41::FRT::mCh::his-58::FRT::gfp::his-58]] II; bqSi301[pBN158(unc-119(+)) Pmyo-3::FLP_pOG44]] IV                  | this study       |
| BN329         | nhr-82          | FLP G5     | unc-119(ed3) III; bqSi329[pBN176(unc-119(+)) Pnhr-82::FLP_G5]] IV                                                                                 | this study       |
| BN330         | nhr-82          | FLP G5     | unc-119(ed3) III; bqSi330[pBN176(unc-119(+)) Pnhr-82::FLP_G5]] IV                                                                                 | this study       |
| BN333         | nhr-82          | FLP G5     | bqSi235[pBN103(unc-119(+)) Pemr-1::emr-1::GFP]] II; bqSi329[pBN176(unc-119(+)) Pnhr-82::FLP_G5]] IV                                               | this study       |

|       |         |                 |                                                                                                                                                |            |
|-------|---------|-----------------|------------------------------------------------------------------------------------------------------------------------------------------------|------------|
| BN334 | nhr-82  | FLP G5          | bqSi235[pBN103(unc-119(+) Pemr-1::emr-1::GFP)] II; bqSi330[pBN176(unc-119(+) Pnhr-82::FLP_G5)] IV                                              | this study |
| BN335 | nhr-82  | FLP G5          | bqSi294[pBN154(unc-119(+) Phsp16.41::FRT::mCh::his-58::FRT::gfp::his-58)] II; bqSi329[pBN176(unc-119(+) Pnhr-82::FLP_G5)] IV                   | this study |
| BN336 | nhr-82  | FLP G5          | bqSi294[pBN154(unc-119(+) Phsp16.41::FRT::mCh::his-58::FRT::gfp::his-58)] II; bqSi330[pBN176(unc-119(+) Pnhr-82::FLP_G5)] IV                   | this study |
| BN442 | nhr-82  | FLP G5          | bqSi294[pBN154(unc-119(+) Phsp16.41::FRT::mCh::his-58::FRT::gfp::his-58)] II; bqEx442[pBN176(unc-119(+) Pnhr-82::FLP_G5)+pRF4(rol-6(su1006))]  | this study |
| BN443 | nhr-82  | FLP G5          | bqSi294[pBN154(unc-119(+) Phsp16.41::FRT::mCh::his-58::FRT::gfp::his-58)] II; bqEx443[pBN176(unc-119(+) Pnhr-82::FLP_G5)+pRF4(rol-6(su1006))]  | this study |
| BN444 | nhr-82  | FLP G5          | bqSi294[pBN154(unc-119(+) Phsp16.41::FRT::mCh::his-58::FRT::gfp::his-58)] II; bqEx444[pBN176(unc-119(+) Pnhr-82::FLP_G5)+pRF4(rol-6(su1006))]  | this study |
| BN445 | nhr-82  | FLP G5          | bqSi294[pBN154(unc-119(+) Phsp16.41::FRT::mCh::his-58::FRT::gfp::his-58)] II; bqEx445[pBN176(unc-119(+) Pnhr-82::FLP_G5)+pRF4(rol-6(su1006))]  | this study |
| BN326 | unc-119 | FLP G5          | unc-119(ed3) III; bqSi326[pBN173(unc-119(+) Punc-119::FLP_G5)] IV                                                                              | this study |
| BN331 | unc-119 | FLP G5          | bqSi235[pBN103(unc-119(+) Pemr-1::emr-1::GFP)] II; bqSi326[pBN173(unc-119(+) Punc-119::FLP_G5)] IV                                             | this study |
| BN332 | unc-119 | FLP G5          | bqSi294[pBN154(unc-119(+) Phsp16.41::FRT::mCh::his-58::FRT::gfp::his-58)] II; bqSi326[pBN173(unc-119(+) Punc-119::FLP_G5)] IV                  | this study |
| BN441 | unc-119 | FLP G5          | bqSi294[pBN154(unc-119(+) Phsp16.41::FRT::mCh::his-58::FRT::gfp::his-58)] II; bqEx441[pBN173(unc-119(+) Punc-119::FLP_G5)+pRF4(rol-6(su1006))] | this study |
| BN476 | dat-1   | FLAG-NLS-FLP D5 | unc-119(ed3) III; bqSi476[pBN252(unc-119(+) Pdat-1::FLAG::NLS::FLP_D5)] IV                                                                     | this study |
| BN478 | dat-1   | FLAG-NLS-FLP D5 | bqSi235[pBN103(unc-119(+) Pemr-1::emr-1::GFP)] II; bqSi476[pBN252(unc-119(+) Pdat-1::FLAG::NLS::FLP_D5)] IV                                    | this study |
| BN479 | dat-1   | FLAG-NLS-FLP D5 | bqSi294[pBN154(unc-119(+) Phsp16.41::FRT::mCh::his-58::FRT::gfp::his-58)] II; bqSi476[pBN252(unc-119(+) Pdat-1::FLAG::NLS::FLP_D5)] IV         | this study |



|       |           |                  |                                                                                                                                                     |            |
|-------|-----------|------------------|-----------------------------------------------------------------------------------------------------------------------------------------------------|------------|
| BN493 | dat-1     | FLAG-NLS-FLP D5  | bqSi493[pBN273(unc-119(+)<br>Pdat-1::FLP_D5_FLAG-NLS)] I; unc-119(ed3) III                                                                          | this study |
| BN470 | hsp-16.41 | FLAG-NLS-FLP D5  | unc-119(ed3) III; bqSi470[pBN261(unc-119(+)<br>Phsp16.41::FLAG::NLS::FLP_D5)] IV                                                                    | this study |
| BN472 | hsp-16.41 | FLAG-NLS-FLP D5  | bqSi235[pBN103(unc-119(+)<br>Pemr-1::emr-1::GFP)] II; bqSi470[pBN261(unc-119(+)<br>Phsp-16.41::FLAG::NLS::FLP_D5)] IV                               | this study |
| BN473 | hsp-16.41 | FLAG-NLS-FLP D5  | bqSi294[pBN154(unc-119(+)<br>Phsp16.41::FRT::mCh::his-58::FRT::gfp::his-58)] II; bqSi470[pBN261(unc-119(+)<br>Phsp-16.41::FLAG::NLS::FLP_D5)] IV    | this study |
| BN646 | hsp-16.41 | FLAG-NLS-FLP D5  | bqSi640[pBN368(unc-119(+)<br>Pdpy-7::FRT::mCh::his-58::FRT::gfp::his-58)] II; bqSi470[pBN261(unc-119(+)<br>Phsp-16.41::FLAG::NLS::FLP_D5)] IV       | this study |
| BN458 | nhr-82    | FLAG-NLS-FLP D5  | unc-119(ed3) III; bqSi458[pBN238(unc-119(+)<br>Pnhr-82::FLAG-NLS-FLP_D5-3'tbb-2)] IV                                                                | this study |
| BN459 | nhr-82    | FLAG-NLS-FLP D5  | unc-119(ed3) III; bqSi459[pBN238(unc-119(+)<br>Pnhr-82::FLAG-NLS-FLP_D5-3'tbb-2)] IV                                                                | this study |
| BN460 | nhr-82    | FLAG-NLS-FLP D5  | bqSi235[pBN103(unc-119(+)<br>Pemr-1::emr-1::GFP)] II; bqSi458[pBN238(unc-119(+)<br>Pnhr-82::FLAG-NLS-FLP_D5-3'tbb-2)] IV                            | this study |
| BN461 | nhr-82    | FLAG-NLS-FLP D5  | bqSi235[pBN103(unc-119(+)<br>Pemr-1::emr-1::GFP)] II; bqSi459[pBN238(unc-119(+)<br>Pnhr-82::FLAG-NLS-FLP_D5-3'tbb-2)] IV                            | this study |
| BN462 | nhr-82    | FLAG-NLS-FLP D5  | bqSi294[pBN154(unc-119(+)<br>Phsp16.41::FRT::mCh::his-58::FRT::gfp::his-58)] II; bqSi458[pBN238(unc-119(+)<br>Pnhr-82::FLAG-NLS-FLP_D5-3'tbb-2)] IV | this study |
| BN463 | nhr-82    | FLAG-NLS-FLP D5  | bqSi294[pBN154(unc-119(+)<br>Phsp16.41::FRT::mCh::his-58::FRT::gfp::his-58)] II; bqSi458[pBN238(unc-119(+)<br>Pnhr-82::FLAG-NLS-FLP_D5-3'tbb-2)] IV | this study |
| BN492 | dat-1     | FLP D5           | unc-119(ed3) III; bqSi492[pBN283(unc-119(+)<br>Pdat-1::FLP_D5)] IV                                                                                  | this study |
| BN500 | dat-1     | FLP D5           | bqSi294[pBN154(unc-119(+)<br>Phsp16.41::FRT::mCh::his-58::FRT::gfp::his-58)] II; bqSi492[pBN283(unc-119(+)<br>Pdat-1::FLP_D5)] IV                   | this study |
| BN614 | dat-1     | FLP D5::SL2::mNG | unc-119(ed3) III; bqSi614[pBN338(unc-119(+)<br>Pdat-1::FLP_D5::SL2::mNG)] IV                                                                        | this study |

|       |           |                  |                                                                                                                                       |            |
|-------|-----------|------------------|---------------------------------------------------------------------------------------------------------------------------------------|------------|
| BN615 | dat-1     | FLP D5::SL2::mNG | unc-119(ed3) III; bqSi615[pBN338(unc-119(+) Pdat-1::FLP_D5::SL2::mNG)] IV                                                             | this study |
| BN616 | dat-1     | FLP D5::SL2::mNG | bqSi189[pBN13(unc-119(+) Plmn-1::mCherry::his-58)] II; bqSi614[pBN338(unc-119(+) Pdat-1::FLP_D5::SL2::mNG)] IV                        | this study |
| BN617 | dat-1     | FLP D5::SL2::mNG | bqSi294[pBN154(unc-119(+) Phsp16.41::FRT::mCh::his-58::FRT::gfp::his-58)] II; bqSi614[pBN338(unc-119(+) Pdat-1::FLP_D5::SL2::mNG)] IV | this study |
| BN548 | dpy-7     | FLP D5           | unc-119(ed3) III; bqSi548[pBN266(unc-119(+) Pdpi-7::FLP_D5)] IV                                                                       | this study |
| BN549 | dpy-7     | FLP D5           | unc-119(ed3) III; bqSi549[pBN266(unc-119(+) Pdpi-7::FLP_D5)] IV                                                                       | this study |
| BN550 | dpy-7     | FLP D5           | bqSi294[pBN154(unc-119(+) Phsp16.41::FRT::mCh::his-58::FRT::gfp::his-58)] II; bqSi548[pBN266(unc-119(+) Pdpi-7::FLP_D5)] IV           | this study |
| BN551 | dpy-7     | FLP D5           | bqSi294[pBN154(unc-119(+) Phsp16.41::FRT::mCh::his-58::FRT::gfp::his-58)] II; bqSi549[pBN266(unc-119(+) Pdpi-7::FLP_D5)] IV           | this study |
| BN508 | elt-2     | FLP D5           | unc-119(ed3) III; bqSi508[pBN282(unc-119(+) Pelt-2::FLP_D5)] IV                                                                       | this study |
| BN528 | elt-2     | FLP D5           | bqSi294[pBN154(unc-119(+) Phsp16.41::FRT::mCh::his-58::FRT::gfp::his-58)] II; bqSi508[pBN282(unc-119(+) Pelt-2::FLP_D5)] IV           | this study |
| BN494 | hlh-8     | FLP D5           | unc-119(ed3) III; bqSi494[pBN279(unc-119(+) Phlh-8::FLP_D5)] IV                                                                       | this study |
| BN502 | hlh-8     | FLP D5           | bqSi294[pBN154(unc-119(+) Phsp16.41::FRT::mCh::his-58::FRT::gfp::his-58)] II; bqSi494[pBN279(unc-119(+) Phlh-8::FLP_D5)] IV           | this study |
| BN610 | hsp-16.41 | FLP D5           | unc-119(ed3) III; bqSi610[pBN262(unc-119(+) Phsp-16.42::FLP_D5)] IV                                                                   | this study |
| BN611 | hsp-16.41 | FLP D5           | unc-119(ed3) III; bqSi611[pBN262(unc-119(+) Phsp-16.42::FLP_D5)] IV                                                                   | this study |
| BN612 | hsp-16.41 | FLP D5           | bqSi189[pBN13(unc-119(+) Plmn-1::mCherry::his-58)] II; bqSi610[pBN262(unc-119(+) Phsp-16.42::FLP_D5)] IV                              | this study |

|       |           |        |                                                                                                                                   |            |
|-------|-----------|--------|-----------------------------------------------------------------------------------------------------------------------------------|------------|
| BN613 | hsp-16.41 | FLP D5 | bqSi189[pBN13(unc-119(+)<br>Plmn-1::mCherry::his-58)] II; bqSi611[pBN262(unc-119(+)<br>Phsp-16.42::FLP_D5)] IV                    | this study |
| BN555 | lag-2     | FLP D5 | unc-119(ed3) III; bqSi555[pBN310(unc-119(+)<br>Plag-2::FLP_D5)] IV                                                                | this study |
| BN556 | lag-2     | FLP D5 | unc-119(ed3) III; bqSi556[pBN310(unc-119(+)<br>Plag-2::FLP_D5)] IV                                                                | this study |
| BN557 | lag-2     | FLP D5 | bqSi294[pBN154(unc-119(+)<br>Phsp16.41::FRT::mCh::his-58::FRT::gfp::his-58)] II; bqSi555[pBN310(unc-119(+)<br>Plag-2::FLP_D5)] IV | this study |
| BN487 | mec-7     | FLP D5 | unc-119(ed3) III; bqSi487[pBN278(unc-119(+)<br>Pmec-7::FLP_D5)] IV                                                                | this study |
| BN496 | mec-7     | FLP D5 | bqSi235[pBN103(unc-119(+)<br>Pemr-1::emr-1::GFP)] II; bqSi487[pBN278(unc-119(+)<br>Pmec-7::FLP_D5)] IV                            | this study |
| BN498 | mec-7     | FLP D5 | bqSi294[pBN154(unc-119(+)<br>Phsp16.41::FRT::mCh::his-58::FRT::gfp::his-58)] II; bqSi487[pBN278(unc-119(+)<br>Pmec-7::FLP_D5)] IV | this study |
| BN505 | mec-7     | FLP D5 | bqSi471[pBN255(unc-119(+)<br>Phsp-16.41::FRT::mCh::his-58::FRT::peel-1)] II; bqSi487[pBN278(unc-119(+)<br>Pmec-7::FLP_D5)] IV     | this study |
| BN541 | myo-2     | FLP D5 | unc-119(ed3) III; bqSi541[pBN263(unc-119(+)<br>Pmyo-2::FLP_D5)] IV                                                                | this study |
| BN543 | myo-2     | FLP D5 | bqSi294[pBN154(unc-119(+)<br>Phsp16.41::FRT::mCh::his-58::FRT::gfp::his-58)] II; bqSi541[pBN263(unc-119(+)<br>Pmyo-2::FLP_D5)] IV | this study |
| BN495 | myo-3     | FLP D5 | unc-119(ed3) III; bqSi495[pBN260(unc-119(+)<br>Pmyo-3::FLP_D5)] IV                                                                | this study |
| BN503 | myo-3     | FLP D5 | bqSi294[pBN154(unc-119(+)<br>Phsp16.41::FRT::mCh::his-58::FRT::gfp::his-58)] II; bqSi495[pBN260(unc-119(+)<br>Pmyo-3::FLP_D5)] IV | this study |
| BN545 | myo-3     | FLP D5 | bqSi471[pBN255(unc-119(+)<br>Phsp-16.41::FRT::mCh::his-58::FRT::peel-1)] II; bqSi495[pBN260(unc-119(+)<br>Pmyo-3::FLP_D5)] IV     | this study |
| BN453 | nhr-82    | FLP D5 | unc-119(ed3) III; bqSi453[pBN237(unc-119(+)<br>Pnhr-82::FLP_D5)] IV                                                               | this study |

|       |                           |        |                                                                                                                                                                            |                              |
|-------|---------------------------|--------|----------------------------------------------------------------------------------------------------------------------------------------------------------------------------|------------------------------|
| BN454 | nhr-82                    | FLP D5 | bqSi235[pBN103(unc-119(+) Pemr-1::emr-1::GFP)] II; bqSi453[pBN237(unc-119(+) Pnhr-82::FLP_D5)] IV                                                                          | this study                   |
| BN455 | nhr-82                    | FLP D5 | bqSi294[pBN154(unc-119(+) Phsp16.41::FRT::mCh::his-58::FRT::gfp::his-58)] II; bqSi453[pBN237(unc-119(+) Pnhr-82::FLP_D5)] IV                                               | this study                   |
| BN506 | rgef-1                    | FLP D5 | unc-119(ed3) III; bqSi506[pBN267(unc-119(+) Prgef-1::FLP_D5)] IV                                                                                                           | this study                   |
| BN507 | rgef-1                    | FLP D5 | bqSi294[pBN154(unc-119(+) Phsp16.41::FRT::mCh::his-58::FRT::gfp::his-58)] II; bqSi506[pBN267(unc-119(+) Prgef-1::FLP_D5)] IV                                               | this study                   |
| BN546 | rgef-1                    | FLP D5 | bqSi471[pBN255(unc-119(+) Phsp-16.41::FRT::mCh::his-58::FRT::peel-1)] II; bqSi506[pBN267(unc-119(+) Prgef-1::FLP_D5)] IV                                                   | this study                   |
| BN604 | rgef-1                    | FLP D5 | wpls36[Punc-47::mCherry] I; bqSi294[pBN154(unc-119(+) Phsp16.41::FRT::mCh::his-58::FRT::gfp::his-58)] II; bqSi506[pBN267(unc-119(+) Prgef-1::FLP_D5)] IV                   | this study                   |
| BN623 | rgef-1                    | FLP D5 | bqSi294[pBN154(unc-119(+) Phsp16.41::FRT::mCh::his-58::FRT::gfp::his-58)] II; otis181[dat-1::mCherry + ttx-3::mCherry] III; bqSi506[pBN267(unc-119(+) Prgef-1::FLP_D5)] IV | this study                   |
| BN488 | tph-1                     | FLP D5 | unc-119(ed3) III; bqSi488[pBN280(unc-119(+) Ptp-1::FLP_D5)] IV                                                                                                             | this study                   |
| BN497 | tph-1                     | FLP D5 | bqSi235[pBN103(unc-119(+) Pemr-1::emr-1::GFP)] II; bqSi488[pBN280(unc-119(+) Ptp-1::FLP_D5)] IV                                                                            | this study                   |
| BN499 | tph-1                     | FLP D5 | bqSi294[pBN154(unc-119(+) Phsp16.41::FRT::mCh::his-58::FRT::gfp::his-58)] II; bqSi488[pBN280(unc-119(+) Ptp-1::FLP_D5)] IV                                                 | this study                   |
| BN504 | tph-1                     | FLP D5 | bqSi471[pBN255(unc-119(+) Phsp-16.41::FRT::mCh::his-58::FRT::peel-1)] II; bqSi488[pBN280(unc-119(+) Ptp-1::FLP_D5)] IV                                                     | this study                   |
| BN542 | unc-47                    | FLP D5 | unc-119(ed3) III; bqSi542[pBN303(unc-119(+) Punc-47::FLP_D5)] IV                                                                                                           | this study                   |
| BN544 | unc-47                    | FLP D5 | bqSi294[pBN154(unc-119(+) Phsp16.41::FRT::mCh::his-58::FRT::gfp::his-58)] II; bqSi542[pBN303(unc-119(+) Punc-47::FLP_D5)] IV                                               | this study                   |
| BN225 | Fluorescent marker chr IV |        | bqSi225[pBN34(unc-119(+) Pemr-1::emr-1::mcherry)] IV                                                                                                                       | Morales-Martínez et al. 2015 |

|        |                             |                                                                                                                                    |                               |
|--------|-----------------------------|------------------------------------------------------------------------------------------------------------------------------------|-------------------------------|
| BN243  | Fluorescent markers II & IV | bqSi235[pBN103(unc-119(+) Pembr-1::emr-1::GFP)] II; bqSi242[pBN37(unc-119(+) Plem-2::lem-2::mCherry)] IV                           | González-Aguilera et al. 2014 |
| BN578  | Fluorescent markers II & IV | bqSi189[pBN13(unc-119(+) Plmn-1::mCherry::his-58)] II; bqSi577[pBN306(unc-119(+) Pmyo-2::GFP)] IV                                  | this study                    |
| BN294  | Dual color reporter         | bqSi294[pBN154(unc-119(+) Phsp16.41::FRT::mCh::his-58::FRT::gfp::his-58)] II                                                       | this study                    |
| BN310  | Dual color reporter         | bqSi294[pBN154(unc-119(+) Phsp16.41::FRT::mCh::his-58::FRT::gfp::his-58)] II; bqSi242[pBN37(unc-119(+) Plem-2::lem-2::mCherry)] IV | this study                    |
| BN640  | Dual color reporter         | bqSi640[pBN368(unc-119(+) Pdpi-7::FRT::mCh::his-58::FRT::gfp::his-58)] II; unc-119(ed3) III                                        | this study                    |
| BN471  | PEEL-1 parental strain      | bqSi471[pBN255(unc-119(+) Phsp-16.41::FRT::mCh::his-58::FRT::peel-1)] II; unc-119(ed9) III                                         | this study                    |
| BN477  | PEEL-1 parental strain      | bqSi471[pBN255(unc-119(+) Phsp-16.41::FRT::mCh::his-58::FRT::peel-1)] II; bqSi225[pBN34(unc-119(+) Pembr-1::emr-1::mcherry)] IV    | this study                    |
| BN552  | G>F>unc-119>P::BAF-1        | baf-1(bq7[g>f>unc-119(+)>p::baf-1]) unc-119(ed3) III                                                                               | this study                    |
| BN565  | G>F>P::BAF-1                | baf-1(bq12[g>f>p::baf-1]) unc-119(ed3) III                                                                                         | this study                    |
| BN580  | G>F>P::BAF-1                | baf-1(bq12[g>f>p::baf-1]) III                                                                                                      | this study                    |
| BN582  | G>F>P::BAF-1; Pelt-2::FLP   | baf-1(bq12[g>f>p::baf-1]) unc-119(ed3) III; bqSi508[pBN282(unc-119(+) Pelt-2::FLP_D5)] IV                                          | this study                    |
| EG4322 | MosSCI host strain          | ttTi5605 II; unc-119(ed9) III                                                                                                      | Frøkjær-Jensen et al. 2012    |
| EG5003 | MosSCI host strain          | unc-119(ed3) III; cxTi10882 IV                                                                                                     | Frøkjær-Jensen et al. 2012    |
| EG6700 | MosSCI host strain          | unc-119(ed3) III; cxTi10882 IV; oxEx1579                                                                                           | Frøkjær-Jensen et al. 2012    |

|        |                             |                                                                                        |                                |
|--------|-----------------------------|----------------------------------------------------------------------------------------|--------------------------------|
| OH7193 | Marker dopaminergic neurons | otIs181[dat-1::mCherry + ttx-3::mCherry] III; him-8(e1489) IV                          | Flames and Hobert. 2009        |
| XE1375 | Marker GABAergic neurons    | wpls36[Punc-47::mCherry] I; wpSi1 II; eri-1(mg366) IV; rde-1(ne219) V; lin-15B(n744) X | Firnhaber and Hammarlund. 2013 |

---

Note that crossed FLP strains may still carry unc-119(ed3) or unc-119(ed9) III.

Firnhaber, C., and M. Hammarlund, 2013

Neuron-Specific Feeding RNAi in *C. elegans* and Its Use in a Screen for Essential Genes Required for GABA Neuron Function. *PLoS Genet* 9: e1003921.

Flames, N., and O. Hobert, 2009

Gene regulatory logic of dopamine neuron differentiation. *Nature* 458: 885-889.

Frokjaer-Jensen, C., M. W. Davis, M. Ailion and E. M. Jorgensen, 2012

Improved Mos1-mediated transgenesis in *C. elegans*. *Nat Methods* 9: 117-118.

Gonzalez-Aguilera, C., K. Ikegami, C. Ayuso, A. de Luis, M. Iniguez et al., 2014

Genome-wide analysis links emerin to neuromuscular junction activity in *Caenorhabditis elegans*. *Genome Biol* 15: R21.

Morales-Martinez, A., A. Dobrzynska and P. Askjaer, 2015

Inner nuclear membrane protein LEM-2 is required for correct nuclear separation and morphology in *C. elegans*. *J Cell Sci* 128: 1090-1096.

## Supporting Information

### FLP sequences

#### FLP pWD79 with *glh-2* 3'UTR

ggtaccaaaaATGCCACAATTTGGTATATTATGTAAAACACCACCTAAGGTGCTTGTT  
CGTCAGTTTGTGGAAAGGTTTGAAGACCTTCAGGTGAGAAAATAGCATTATGT  
GCTGCTGAACTAACCTATTTATGTTGGATGATTACACATAACGGAACAGCAATCA  
AGAGAGCCACATTCATGAGCTATAATACTATCATAAGCAATTCGCTGAGTTTCGA  
TATTGTCAATAAATCACTCCAGTTTAAATACAAGACGCAAAAAGCAACAATTCTG  
GAAGCCTCATTAAAGAAATTGATTCCTGCTTGGGAATTTACAATTATTCCTTACTA  
TGGACAAAACATCAATCTGATgtaagtttaacatatataactaactaaccctgattatttaattttcagA  
TCACTGATATTGTAAGTAGTTTGCAATTACAGTTCGAATCATCGGAAGAAGCAGA  
TAAGGGAAATAGCCACAGTAAAAAATGCTTAAAGCACTTCTAAGTGAGGGTGA  
AAGCATCTGGGAGATCACTGAGAAAATACTAAATTCGTTTGAGTATACTTCGAGA  
TTTACAAAACAAAACTTTATACCAATTCCTCTTCCTAGCTACTTTTCATCAATTG  
TGGAAGATTCAGCGATATTAAGAACGTTGATCCGAAATCATTTAAATTAGTCCAA  
AATAAGTATCTGGGAGTAATAATCCAGTGTTTAGTGACAGAGACAAAGACAAGC  
GTTAGTAGGCACATATACTTCTTTAGCGCAAGGGGTAGGATCGATCCACTTGTA  
TATTTGGATGAATTTTTGAGGAATTCTGAACCAGTCCTAAAACGAGTAAATAGGA  
CCGGCAATTCTTCAAGCAACAAGCAGGAATACCAATTATTAAGATAACTTAGT  
CAGATCGTACAACAAAGCTTTGAAGAAAAATGCGCCTTATTCAATCTTTGCTATA  
AAAAATGGCCCAAATCTCACATTGGAAGACATTTGATGACCTCATTTCTTTCAA  
TGAAGGGCCTAACGGAGTTGACTAATGTTGTGGGAAATTGGAGCGATAAGCGT  
GCTTCTGCCGTGGCCAGGACAACGTATACTCATCAGATAACAGCAATACCTGAT  
CACTACTTCGCACTAGTTTCTCGGTACTATGCATATGATCCAATATCAAAGGAAA  
TGATAGCATTGAAGGATGAGACTAATCCAATTGAGGAGTGGCAGCATATAGAAC  
AGCTAAAGGGTAGTGCTGAAGGAAGCATACGATACCCCGCATGGAATGGGATA  
ATATCACAGGAGGTACTAGACTACCTTTTCATCCTACATAAATAGACGCATATAAgt  
acgcatttaagcataaacacgctagcATGTATCTGCATATCCTTCAAATGttgtccatattgtatcagta  
aattataatgcccccttttatatattctccttatcatgaaatgttctattgatttttgctggtgtaaacgttttatagtaaacc  
tctccacagtgaatttgtaattgtatcaaaacaagacattgattaaattgttcgagactgtggattgtaaaatatttgc  
agaaaatggcaatattcatttagaaacattactccataataggaaaaactatttatgagtttcatgtgcctatgcaagttc  
ccactctgtgtgaatttcatatacaaaattgagcaaacataaggtttatgtccagtatgggttctcagatgtttgtaagagtt  
gagctgtcgggtaatgccttctcacattgagcacatggatcgggtctctccagtggtgttctgaaataatgaaaaata  
gtcttgcaatatgttctactattcgagaaaaaatgtaattttttcttatggttaacc

#### FLP G5 with *glh-2* 3'UTR (codon optimized)

ggtaccaaaaATGCCACAATTCGGAATTCTCTGTAAGACACCACCAAAGTCCTCGT  
CCGTCAATTCGTCGAGCGTTTCGAGCGTCCATCCGGAGAGAAGATCGCCCTCT  
GCGCCGCGGAGCTCACCTACCTCTGCTGGATGATCACCCACAACGGAACCGCC  
ATCAAGCGTGCCACCTTCATGTCCTACAACACCATCATCTCCAACCTCCTCTCCT  
TCGACATCGTCAACAAGTCCCTCCAATTCAAGTACAAGACCCAAAAGGCCACCA  
TCCTCGAGGCCTCCCTCAAGgtaagtttaacatatataactaactaaccctgattatttaattttcagA  
AGCTCATCCCAGCCTGGGAGTTCACCATCATCCCATACTACGGACAAAAGCACC  
AATCCGACATCACCGACATCGTCTCCTCCCTCCAACCTCCAATTCGAGTCCTCCG  
AGGAGGCCGACAAGGGAAACTCCCACTCCAAGAAGATGCTCAAGGCCCTCCTC  
TCCGAGGGAGAGTCCATCTGGGAGATCACCGAGAAGATCCTCAACTCCTTCGA  
GTACACCTCCCGTTTACCAAGACCAAGACCCTCTACCAATTCCTCTTCCTCGC  
CACCTTCATCAACTGCGGACGTTTCTCCGACATCAAGAACGTCGACCCAAAGTC

CTTCAAGCTCGTCCAAAACAAGTACCTCGGAGTCATCATCCAATGCCTCGTCAC  
CGAGACCAAGACCTCCGTCTCCCGTCACATCTACTTCTTCTCCGCCCGTGGACG  
TATCGACCCACTCGTCTACCTCGACGAGTTCTCCGTA ACTCCGAGCCAGTCCT  
CAAGCGTGTCAACCGTACCGGAAACTCCTCCTCCAACAAGCAAGAGTACCAACT  
CCTCAAGGACAACCTCGTCCGTTCTACAACAAGGCCCTCAAGAAGAACGCC  
CATACTCCATCTTCGCCATCAAGAACGGACCAAAGTCCCACATCGGACGTCACC  
TCATGACCTCCTTCTCTCCATGAAGgtaagtttaaacatgatttactaactaactaatctgattaaat  
tttcagGGACTCACCAGCTCACCAACGTCGTCGGAAACTGGTCCGACAAGCGTG  
CCTCCGCCGTGCGCCGTACCACCTACACCCACCAAATCACCGCCATCCCAGAC  
CACTACTTCGCCCTCGTCTCCCGTTACTACGCCTACGACCCAATCTCCAAGGAG  
ATGATCGCCCTCAAGGACGAGACCAACCCAATCGAGGAGTGGCAACACATCGA  
GCAACTCAAGGGATCCGCCGAGGGATCCATCCGTTACCCAGCCTGGAACGGAA  
TCATCTCCCAAGAGGTCCTCGACTACCTCTCCTCTACATCAACCGTCGTATCTA  
Aacgcgatgtatctgcatatcctcaaatggtgccaatattgtatcagtaaattataatgcccccttttatattctccttatcat  
gtaaattgtctattgatttttgctggtgtaaaacgttttatagtaaactctccacagtgaatttgtaaattgtatcaaaaca  
agacattgattaaattgttcgagactgtggattgtaaaatattttgcagaaaatggcaatattcatttagaaacattacttc  
cataataggaaaaactattatgagtttcatgtgcctatgcaagttccactctgtgtaattcatcatacaaatgagca  
aacataaggtttatgtccagatgggttctcagatgtttgtaagagttgagctgctggatgaatgccttctcacttgagcac  
atggatcggctctctccagtggtgttctgaaataatgaaaaatagcttgcaatattgttctactattcgagaaaaaatg  
taattttttcttatgtaacc

FLP D5 with *gfh-2* 3'UTR (codon optimized)

ggtaccaaaaATGCCACAATTTCGACATTCTCTGTAAGACACCACCAAAGTCCTCGT  
CCGTCAATTTCGTTCGAGCGTTTCGAGCGTCCATCCGGAGAGAAGATCGCCCTCT  
GCGCCGCCGAGCTCACCTACCTCTGCTGGATGATCACCCACAACGGAACCGCC  
ATCAAGCGTGCCACCTTCATGTCCTACAACACCATCATCTCCAACTCCCTCTCCT  
TCGACATCGTCAACAAGTCCCTCCAATTCAAGTACAAGACCCAAAAGGCCACCA  
TCCTCGAGGCCTCCCTCAAGgtaagtttaaacatataataactaactaaccctgattattaaattttcagA  
AGCTCATCCCAGCCTGGGAGTTCACCATCATCCCATACTACGGACAAAAGCACC  
AATCCGACATCACCGACATCGTCTCCTCCCTCCAACTCCAATTCGAGTCCTCCG  
AGGAGGCCGACAAGGGAAACTCCCACTCCAAGAAGATGCTCAAGGCCCTCCTC  
TCGGAGGGAGAGTCCATCTGGGAGATCACCGAGAAGATCCTCAACTCCTTCGA  
GTACACCTCCCGTTTTACCAAGACCAAGACCCTCTACCAATTCCTCTTCCTCGC  
CACCTTCATCAACTGCGGACGTTTCTCCGACATCAAGAACGTTCGACCCAAAGTC  
CTTCAAGCTCGTCCAAAACAAGTACCTCGGAGTCATCATCCAATGCCTCGTCAC  
CGAGACCAAGACCTCCGTCTCCCGTCACATCTACTTCTTCTCCGCCCGTGGACG  
TATCGACCCACTCGTCTACCTCGACGAGTTCTCCGTA ACTCCGAGCCAGTCCT  
CAAGCGTGTCAACCGTACCGGAAACTCCTCCTCCAACAAGCAAGAGTACCAACT  
CCTCAAGGACAACCTCGTCCGTTCTACAACAAGGCCCTCAAGAAGAACGCC  
CATACTCCATCTTCGCCATCAAGAACGGACCAAAGTCCCACATCGGACGTCACC  
TCATGACCTCCTTCTCTCCATGAAGgtaagtttaaacatgatttactaactaactaatctgattaaat  
tttcagGGACTCACCAGCTCACCAACGTCGTCGGAAACTGGTCCGACAAGCGTG  
CCTCCGCCGTGCGCCGTACCACCTACACCCACCAAATCACCGCCATCCCAGAC  
CACTACTTCGCCCTCGTCTCCCGTTACTACGCCTACGACCCAATCTCCAAGGAG  
ATGATCGCCCTCAAGGACGAGACCAACCCAATCGAGGAGTGGCAACACATCGA  
GCAACTCAAGGGATCCGCCGAGGGATCCATCCGTTACCCAGCCTGGAACGGAA  
TCATCTCCCAAGAGGTCCTCGACTACCTCTCCTCTACATCAACCGTCGTATCTA  
Aacgcgatgtatctgcatatcctcaaatggtgccaatattgtatcagtaaattataatgcccccttttatattctccttatcat  
gtaaattgtctattgatttttgctggtgtaaaacgttttatagtaaactctccacagtgaatttgtaaattgtatcaaaaca  
agacattgattaaattgttcgagactgtggattgtaaaatattttgcagaaaatggcaatattcatttagaaacattacttc



cataataggaaaaactatztatgagttttcatgtgcctatgcaagttcccactctgtgtgaatttcatcatacaaattgagca  
aacataaggtttatgtccagatggttctcagatgtttgtaagagttgagctgtcggtgaatgccttctcacattgagcac  
atggatcggctctctccagtggtgtctgaaataatgaaaaatagcttgcfaatatgtttctactattcgagaaaaaatg  
taattttttcttatggaacc

FLAG-NLS-FLP D5 with *tbb-2* 3'UTR (codon optimized)

ggtaccaaaaATGGCTAGC**GACTACAAGGACCACGACGGAGACTACAAGGACCAC**  
**GACATCGACTACAAGGACGACGACGACAAG**GCTAGC**ATGTCCCGTCGTCGTAA**  
**GGCCAACCCAACCAAGCTCTCCGAGAACGCCAAGAAGCTCGCCAAGGAGGTCC**  
**AGAAC**ggatccATGCCACAATT**CGAC**ATTCTCTGTAAGACACCACCAAAAGTCCTC  
GTCCGTCAATTCGTTCGAGCGTTTCGAGCGTCCATCCGGAGAGAAGATCGCCCT  
CTGCGCCGCCGAGCTCACCTACCTCTGCTGGATGATCACCCACAACGGAACCG  
CCATCAAGCGTGCCACCTTCATGTCCTACAACACCATCATCTCCAACCTCCCTCT  
CCTTCGACATCGTCAACAAGTCCCTCCAATTCAAGTACAAGACCCAAAAGGCCA  
CCATCCTCGAGGCCTCCCTCAAGGtaagtttaaacatatataactaactaaccctgattatttaatttc  
agAAGCTCATCCCAGCCTGGGAGTTCACCATCATCCCATACTACGGACAAAAGC  
ACCAATCCGACATCACCGACATCGTCTCCTCCCTCCAACCTCCAATTGAGTCCT  
CCGAGGAGGCCGACAAGGGAAACTCCCCTCCAAGAAGATGCTCAAGGCCCTC  
CTCTCCGAGGGAGAGTCCATCTGGGAGATCACCGAGAAGATCCTCAACTCCTT  
CGAGTACACCTCCCGTTTCACCAAGACCAAGACCCCTTACCAATTCCTCTTCTCCT  
CGCCACCTTCATCAACTGCGGACGTTTCTCCGACATCAAGAACGTGCACCCAAA  
GTCCTTCAAGCTCGTCCAAAACAAGTACCTCGGAGTCATCATCCAATGCCTCGT  
CACCGAGACCAAGACCTCCGTCTCCCGTCACATCTACTTCTTCTCCGCCCGTGG  
ACGTATCGACCCACTCGTCTACCTCGACGAGTTCCTCCGTAACCTCCGAGCCAGT  
CCTCAAGCGTGTCAACCGTACCGGAAACTCCTCCTCCAACAAGCAAGAGTACCA  
ACTCCTCAAGGACAACCTCGTCCGTTCTTACAACAAGGCCCTCAAGAAGAACGC  
CCATACTCCATCTTCGCCATCAAGAACGGACCAAAAGTCCCACATCGGACGTCA  
CCTCATGACCTCCTTCTCCTCATGAAGGtaagtttaaacatgattttactaactaactaatctgattta  
aatttcagGGACTCACCGAGCTCACCAACGTCTGCGGAAACTGGTCCGACAAGCG  
TGCTCCGCCGTGCCCCGTACCACCTACACCCACCAATCACCGCCATCCCAG  
ACCACTACTTCGCCCTCGTCTCCCGTTACTACGCCTACGACCCAATCTCCAAGG  
AGATGATCGCCCTCAAGGACGAGACCAACCCAATCGAGGAGTGGCAACACATC  
GAGCAACTCAAGGGATCCGCCGAGGGATCCATCCGTTACCCAGCCTGGAACGG  
AATCATCTCCAAGAGGTCTCTGACTACCTCTCCTCCTACATCAACCGTCGTAT  
CTAAatgcaagatcctttcaagcattcccttctctatcactcttctttttgtcaaaaaattctctcgctaatttattgct  
ttttaatgtatttttatgacttttatagtcactgaaaagttgcatctgagtgaaagtgaatgctatcaaaatgtgattctgtc  
tgatgtactttcacaatctctctcaattccatttgaagtgccttaaacccgaaagggtgagaaaaatgagagcgctcaa  
tattgtattgttgcgtgagtgaccaacaaaaagaggaaactttattgtgcccgaagaaaaagtctcattgcctaa  
gagaaacatatgtggttggaatctccagatcgtggatca

Underlined sequences correspond to introns.

Bold nucleotides highlighted in green correspond to changes to encode an aspartic acid residue at position 5.

Nucleotides highlighted in yellow correspond to 3xFLAG tag.

Nucleotides highlighted in light blue correspond to *egl-13* NLS tag.
